# **Oxytocinergic modulation of stress-associated amygdala-hippocampus pathways in humans is specially mediated by serotonergic mechanisms**

Chunmei Lan<sup>a\*</sup>, Congcong Liu<sup>a,b\*</sup>, Keshuang Li<sup>a,c</sup>, Zhiying Zhao<sup>a,d</sup>, Jiaxin Yang<sup>e</sup>, Yina Ma<sup>e</sup>, Dirk Scheele<sup>f,g</sup>, Yao Shuxia<sup>a</sup>, Keith M. Kendrick<sup>a</sup>, Benjamin Becker<sup>a</sup>

\*authors contributed equally

## **Affiliations**

<sup>a</sup> The Clinical Hospital of the Chengdu Brain Science Institute, School of Life Science and Technology, University of Electronic Science and Technology of China, 611731 Chengdu, China

<sup>b</sup> Department of Psychology, Xinxiang Medical University, Henan 453003, China

<sup>c</sup> School of Psychology and Cognitive Science, East China Normal University, 200062 Shanghai, China

<sup>d</sup> Department of Radiology and Biomedical Imaging, Yale University School of Medicine, New Haven, Connecticut

<sup>e</sup> State Key Laboratory of Cognitive Neuroscience and Learning, IDG/McGovern Institute of Brain Research, Beijing Normal University, 100875 Beijing, China

<sup>f</sup> Division of Medical Psychology, Department of Psychiatry and Psychotherapy, University Hospital Bonn, 53105 Bonn, Germany

<sup>g</sup> Department of Psychiatry, School of Medicine & Health Sciences, University of Oldenburg, 26129 Oldenburg, Germany

## **Address correspondence to**

Benjamin Becker

University of Electronic Science and Technology,  
Xiuyan Avenue 2006, 611731 Chengdu, China

Phone: +86 2861 830 811

Email: [ben\\_becker@gmx.de](mailto:ben_becker@gmx.de)

## **Abstract**

**Background** The hypothalamic neuropeptide oxytocin (OXT) may exert anxiolytic and stress-reducing actions via modulatory effects on amygdala circuits. Animal models and initial findings in humans suggest that some of these effects are mediated by interactions with other neurotransmitter systems, in particular the serotonin (5-HT) system. Against this background, the present pharmacological resting state fMRI study aimed at determining whether effects of OXT on stress-associated amygdala intrinsic networks are mediated by 5-HT.

**Methods** We employed a randomized placebo-controlled double-blind parallel-group pharmacological fMRI resting state experiment during which  $n = 112$  healthy male participants underwent a transient decrease in 5-HT signaling via acute tryptophan depletion ( $ATD^+$ ) or the corresponding placebo-control protocols ( $ATD^-$ ) before the administration of intranasal OXT or placebo intranasal spray, respectively.

**Results** OXT and 5-HT modulation exerted interactive effects on the coupling of the left amygdala with the ipsilateral hippocampus and adjacent midbrain. OXT increased intrinsic coupling in this pathway, while this effect of OXT was significantly attenuated during transiently decreased central serotonergic signaling induced via  $ATD^+$ . In the absence of OXT or 5-HT modulation this pathway was associated with self-reported stress perception in everyday life, while an OXT-induced modulation of this pathway was following  $ATD^-$  pre-treatment.

**Conclusions** Together, the findings provide first evidence that effects of OXT on stress-associated amygdala-hippocampal-midbrain pathways are critically mediated by the 5-HT system in men.

**Keywords** oxytocin, serotonin, amygdala, stress, anxiety

## Introduction

The hypothalamic neuropeptide oxytocin (OXT) regulates socio-emotional behavior across species, with convergent evidence from experimental studies in humans suggesting that the intranasal administration of OXT can e.g. exert pro-social, anxiolytic and stress-reducing effects (Heinrichs et al., 2009; Meyer-Lindenberg et al., 2011; Yao et al., 2018; Xin et al., 2020; Grinevich and Neumann, 2021; Quintana et al., 2021). Accumulating evidence from sophisticated animal models suggests that some of the complex regulatory effects of OXT are critically mediated by interactions with other neurotransmitter systems, such that animal models demonstrated that dopamine partly mediated OXT's effects on pair bonding (Young and Wang, 2004) while the serotonin (5-HT) system critically mediated OXT's regulatory effect in the domains of social reward and anxiety (Yoshida et al., 2009; Dölen et al., 2013; Lefevre et al., 2017). In terms of the anxiolytic properties, a previous rodent study demonstrated a dense expression of OXT receptors in the raphe nucleus, the primary source of central 5-HT and reported that the administration of exogenous OXT facilitated 5-HT release in this region and subsequently reduced anxiety-like behavior (Yoshida et al., 2009). Based on these findings, we recently examined the interactive effects between OXT and 5-HT in humans on threat-related amygdala activity using a randomized parallel-group placebo-controlled pharmacological functional magnetic resonance imaging (fMRI) experiment which combined the intranasal administration of OXT with an acute tryptophan depletion procedure (Liu et al., 2021a). The administration of an acute tryptophan depletion procedure (ATD<sup>+</sup>) represents a robust means to induce a transient decrease in central serotonergic signaling (Veen et al., 2007; Crockett et al., 2008; Evers et al., 2010), and thus pre-treatment with ATD<sup>+</sup> may attenuate some of the potential 5-HT-mediated effects of OXT. We observed that OXT switched amygdala sensitization to social threat signals to desensitization and this potential anxiolytic action of OXT was attenuated following ATD<sup>+</sup>-induced decreased central serotonergic signaling (Liu et al., 2021a).

The amygdala plays a crucial role in fear- and anxiety-related processes (e.g. Mihov et al., 2013; Phelps and LeDoux, 2005; however, see also LeDoux and Pine, 2016; Gothard, 2020; Zhou et al., 2021) and both, OXT and 5-HT effects on the amygdala have been repeatedly documented (Cools et al., 2005; Fisher and Hariri, 2013; Kanat et al., 2015; Raab et al., 2016; Xin et al., 2020; Kreuder et

al., 2020). OXT and 5-HT-sensitive receptors are widely distributed across limbic-striatal-frontal regions (Pasqualetti et al., 1998; Gimpl and Fahrenholz, 2001; Varnäs et al., 2004; Quintana et al., 2019) and thus may not only influence regional activity but also the functional cross-talk between nodes in these networks (Bethlehem et al., 2013). To examine modulatory effects of OXT on the network level while controlling for its valence- and context-specific effects (e.g. (Shamay-Tsoory and Abu-Akel, 2016; Yao et al., 2018; Chen et al., 2020)), an increasing number of studies employed pharmacological resting-state fMRI (pharmaco-rsfMRI) (see e.g. Brodmann et al., 2017; Wu et al., 2020; Jiang et al., 2021; Xin et al., 2021).

Previous studies employing a pharmaco-rsfMRI strategy to determine effects of the intranasal OXT on the intrinsic amygdala networks reported an OXT-induced modulation of the intrinsic coupling of the amygdala with prefrontal regions, particularly medial prefrontal (mPFC) and orbitofrontal regions (Fan et al., 2014; Dodhia et al., 2014; Eckstein et al., 2017; Cheng et al., 2018; Jiang et al., 2021), posterior default mode network (DMN) regions (Kumar et al., 2014) as well as with the hippocampal formation (Fan et al., 2015; Alaerts et al., 2019) with some studies reporting associations between intranasal OXT effects and stress- and emotion processing-associated indices including subclinical depressive symptoms or stress exposure (Fan et al., 2014, 2015; Eckstein et al., 2017). Although fewer studies employed a pharmaco-rsfMRI or ATD<sup>+</sup>-rsfMRI approach to examine modulatory effects of 5-HT on the intrinsic amygdala networks some evidence indicates a serotonergic modulation of pathways partly overlapping with those observed following oxytocinergic modulation, including amygdala-posterior DMN (Dutta et al., 2019; Zhang et al., 2019), amygdala-prefrontal (Eisner et al., 2017) and amygdala-hippocampal connectivity (Carhart-Harris et al., 2015).

Further support for a potential network-level modulatory role of the 5-HT-OXT interactions comes from molecular imaging studies which demonstrated that the administration of exogenous OXT increased 5-HT concentrations in key limbic regions including the amygdala and hippocampus in non-human primates (Lefevre et al., 2017) and that intranasal OXT influenced serotonergic signaling in a broad network encompassing limbic, insular and prefrontal regions in humans (Mottolese et al., 2014; Lefevre et al., 2018). Importantly the study confirmed the central role of the amygdala in regulating 5-HT signaling via OXT such that OXT-induced 5-HT<sub>1A</sub> receptor binding

changes in the amygdala which correlated with changes in the hippocampus, insula and prefrontal cortex (Mottolese et al., 2014). The identified amygdala networks partly resemble pathways involved in stress reactivity and emotion regulation (Etkin et al., 2015). In particular pathways such as the amygdala-hippocampal (Admon et al., 2009; Vaisvaser et al., 2013) and amygdala-prefrontal circuits are sensitive to both, long-term as well as acute stress-exposure (Herrington et al., 2013; Fan et al., 2015, 2014; Park et al., 2018). Together with the role of OXT and 5-HT in regulating the stress response (Neumann and Landgraf, 2012; Olff et al., 2013; Mahar et al., 2014).

Summarizing, accumulating evidence from animal and human models suggest an interaction of OXT and 5-HT in regulating anxiety- and stress-related behavior, however, while both systems have been associated with modulating the amygdala-centered networks, interactive effects on the intrinsic amygdala networks in humans have not been systematically examined. To this end we combined the administration of OXT or placebo (PLC) intranasal spray with an ATD<sup>+</sup>-induced transient decrease in central 5-HT signaling or a matched control protocol (ATD<sup>-</sup>, tryptophan balanced mixture) in a randomized controlled pharmacofMRI parallel group design in n = 121 healthy male subjects (details see also Liu et al., 2021a). Based on previous studies, we hypothesized that (1) OXT's effects on the amygdala intrinsic networks are (partly) mediated by interaction with the 5-HT system and that a transient reduction in 5-HT signaling following ATD<sup>+</sup> would attenuate OXT's effect, and (2) given the role of OXT and 5-HT in stress processing and a high stress-sensitivity of the amygdala intrinsic networks (Sripada et al., 2012; Vaisvaser et al., 2013; Fan et al., 2015; Zhang et al., 2016; Feng et al., 2018) the identified pathways would be associated with levels of currently experienced stress exposure.

## **Material and methods**

### **Participants**

A total of 121 non-smoking, right-handed, young healthy men were enrolled in the present study (detailed study enrollment criteria see also (Liu et al., 2021a). Participants were instructed to abstain from alcohol and caffeine for 24 hours and from food and drinks (except water) for 12 hours prior to the experiment. To examine interaction effects between the OXT and 5-HT systems, a randomized

double-blind placebo-controlled between-group pharmacological resting state fMRI (pharmacofMRI) design was employed during which the subjects received ATD<sup>+</sup> or a control drink balanced for tryptophan (ATD<sup>-</sup>) before they were administered either OXT or a corresponding placebo (PLC) intranasal spray and subsequently underwent resting state fMRI. During initial quality assessments data from 9 subjects were excluded from the following analyses due to mania or depression history (n = 2), technical failure of the MRI system (n = 1), poor spatial registration quality (n = 1) and excessive head motion > 3mm (n = 5) (details see CONSORT flowchart **Figure S1**) leading to a total number of n = 112 subjects for the final analysis (ATD<sup>+</sup>-OXT, n = 29; ATD<sup>+</sup>-PLC, n = 29; ATD<sup>-</sup>-OXT, n = 26; ATD<sup>-</sup>-PLC, n = 28, detailed group characteristics see **Table 1**). We estimated the power of the sample size of treatment (two-way analysis of variance [ANOVA]: amino acid mixture × intranasal spray) in final analysis by means of using the compromise option in G\*power (version 3.1.9.7; <https://www.softpedia.com/get/Science-CAD/G-Power.shtml>) with an expected medium effect size ( $\eta^2_p = 0.06$ ), which revealed 87% power.

All participants provided written informed consent after being fully informed about the experimental procedures. The study had full ethical approval from the Ethics Committee at the University of Electronic Science and Technology of China and adhered to the latest revision of the declaration of Helsinki. The study was preregistered on ClinicalTrials.gov (NCT03426176, <https://clinicaltrials.gov/show/NCT03426176>).

## Procedure

Experimental and treatment procedures were identical to our previous study which reports the results of a task-based fMRI paradigm in the same sample to assess interactive effects of oxytocin and serotonin on amygdala threat reactivity and sensitization (Liu et al., 2021a). Briefly, a randomized, double-blind, placebo-controlled between-subject pharmacofMRI design was employed during which four treatment groups received combinations of amino acid mixture drinks (ATD<sup>+</sup> versus ATD<sup>-</sup>) to induce a transient decrease in central serotonergic signaling and intranasal spray (OXT versus PLC) to modulate central oxytocin signaling. To adhere to the pharmacodynamic profile of treatments participants arrived between 7:30 to 10:00 AM and underwent fMRI acquisition between

13:30 to 16:00 PM. Upon arrival, participants received a standardized protein-poor diet for breakfast. Following the assessment of pre-treatment control variables, participants underwent a previously validated tryptophan depletion protocol with ATD<sup>+</sup> (detailed components of mixtures see **Table S1**) which has been demonstrated to lead to a robust transient reduction in central 5HT signaling (Crockett et al., 2008; Passamonti et al., 2012; Veen et al., 2007) or ATD<sup>-</sup>. The ingestion of the amino acid mixtures was followed by a resting period of 5 hours to achieve a robust reduction in tryptophan levels. During the resting period participants were asked to relax and magazines were provided. Subsequently, control variables were re-assessed and participants administered either OXT (24IU, ingredients: oxytocin, glycerine, sodium chloride and purified water) or PLC (identical ingredients except for oxytocin) intranasal spray. Both intranasal sprays were provided by Sichuan Meike Pharmaceutical Co. Ltd in China. In line with the pharmacokinetic profile of intranasal OXT (Spengler et al., 2017b), rsfMRI data was collected 45 min after OXT/PLC administration. Control variables were re-assessed before and after fMRI acquisition (schematic outline of the experimental protocols see **Figure 1**). The rsfMRI acquisition was followed by a task-based fMRI paradigm assessing amygdala threat reactivity and sensitization (Liu et al., 2021a).

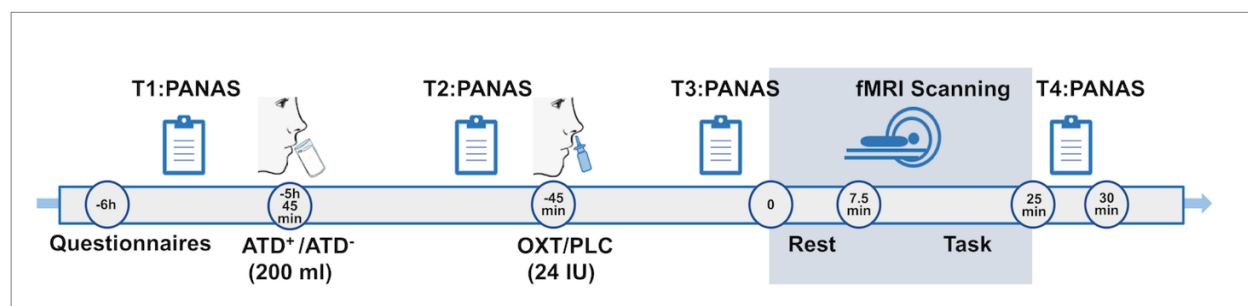

**Figure 1.** Experimental protocols and procedures of the pharmacological resting-state fMRI experiment.

### Behavioral assessments

Anxiety and depression have been associated with amygdala functional networks (Spengler et al., 2017a; Zhao et al., 2019; Xu et al., 2021; Liu et al., 2021b) and therefore corresponding indices were

assessed to control for pre-treatment differences between the groups. To this end the State-Trait Anxiety Inventory (STAI) (Spielberger et al., 1970) and Beck Depression Inventory (BDI-II) (Beck et al., 1996) were applied. The Positive and Negative Affect Schedule (PANAS) (Watson et al., 1988) was repeatedly administered before administration of the amino acid drink (T1) and the intranasal spray (T2) as well as immediately before MRI acquisition (T3) and at the end of the experiment (T4) to control for unspecific effects of treatment on mood (procedure see **Figure1**). No between-group differences in the potential confounders were observed (details see **Table 1**).

Given that both OXT and 5-HT have been strongly associated with stress processing and stress reactivity (Olff et al., 2013; Mahar et al., 2014) as well as associated amygdala activation (Domes et al., 2010; Holmes, 2008) levels of experienced stress during the previous month were acquired using the Perceived Stress Scale (PSS) (Cohen et al., 1983). The PSS scores as a measure of currently perceived stress-exposure was used to examine the associations between current stress levels and identified intrinsic connectivity pathways of the amygdala.

**Table 1 Group characteristics of subject age and questionnaire scores.**

| Measurements | ATD <sup>+</sup> -OXT<br>N = 29 | ATD <sup>+</sup> -PLC<br>N = 29 | ATD <sup>-</sup> -OXT<br>N = 26 | ATD <sup>-</sup> -PLC<br>N = 28 | <i>F</i> (3,108) | <i>p</i> |
|--------------|---------------------------------|---------------------------------|---------------------------------|---------------------------------|------------------|----------|
| Age(years)   | 22.0 (2.4)                      | 21.9 (2.6)                      | 22.2 (2.3)                      | 22.1 (2.2)                      | 0.09             | 0.97     |
| BDI          | 6.0 (6.3)                       | 7.0 (5.7)                       | 5.2 (6.6)                       | 5.1 (5.0)                       | 0.66             | 0.58     |
| STAI-SAI     | 37.7 (8.9)                      | 34.8 (6.3)                      | 34.9 (8.2)                      | 35.9 (6.7)                      | 0.87             | 0.46     |
| STAI-TAI     | 41.1 (8.3)                      | 40.5 (5.9)                      | 38.4 (7.5)                      | 41.2 (6.8)                      | 0.88             | 0.45     |
| PSS          | 14.2 (5.5)                      | 14.9 (4.7)                      | 13.8 (4.9)                      | 15.5 (4.7)                      | 0.62             | 0.61     |
| PANAS-P(T1)  | 24.9 (6.9)                      | 23.9 (8.3)                      | 24.3 (6.9)                      | 25.1 (8.2)                      | 0.15             | 0.93     |
| PANAS-N(T1)  | 15.7 (9.0)                      | 13.1 (5.7)                      | 11.9 (5.2)                      | 13.3 (6.0)                      | 1.56             | 0.20     |

Abbreviations: OXT, Oxytocin; PLC, Placebo; ATD<sup>+</sup>, Acute Tryptophan Depletion; ATD<sup>-</sup>, Tryptophan Balanced Mixture; BDI, Beck's Depression Inventory; CTQ, Childhood Trauma Questionnaire; STAI-TAI, State-Trait Anxiety Inventory-Trait Anxiety Inventory; STAI-SAI, State-Trait Anxiety Inventory-State Anxiety Inventory; PSS, Perceived Stress Scale; PANAS-P, Positive and Negative Affect Schedule-Positive affect, PANAS-N, Positive and Negative Affect Schedule-Negative affect, T1, pre-oral administration.

## MRI data acquisition

MRI data was obtained on a 3-T GE MR750 Discovery MRI system (General Electric Medical System, Milwaukee, WI, USA). High-resolution brain structural data were acquired with a T1-



weighted sequence using the following parameters: repetition time, 6.0 ms; echo time, 1 ms; flip angle, 12°; field of view, 256×256 mm; resolution, 256×256; slice thickness, 1 mm; number of slices, 156. Resting-state functional MRI data were acquired using an echo planar imaging sequence with the following acquisition parameters: repetition time, 2000 ms; echo time, 30 ms; field of view, 220 × 220 mm; flip angle, 90°; resolution, 64×64; slice thickness, 3.2 mm; number of slices, 43. A total number of 225 whole-brain volumes were collected (about 7.5 min). During scanning, two head cushions were used to prevent excessive head motion while ensuring comfort. Participants were instructed to relax and think of nothing in particular while fixating a fixation cross presented centrally via a rear mirror.

### Functional MRI data preprocessing

The first 10 volumes of the resting-state time-series were discarded for each subject and subsequent fMRI data preprocessing was carried out using FSL FEAT 6.0 (<https://www.fmrib.ox.ac.uk/fsl>). The following preprocessing steps were applied: brain extraction with BET (Brain Extraction Tool, v2.1), motion correction, slice-timing correction, spatial smoothing with a Gaussian kernel of 5 mm full width at half maximum, intensity normalization and 0.01-0.1 Hz band-pass filtering after ICA-AROMA was employed (Pruim et al., 2015). Mean signals from white matter and cerebrospinal fluid (CSF) were removed by means of linear regression. Registration of functional data to high resolution structural images was carried out using FLIRT with boundary-based registration (Jenkinson and Smith, 2001; Jenkinson et al., 2002; Greve and Fischl, 2009). Registration from high resolution structural to standard space was then further improved using FNIRT nonlinear registration with 12 degrees of freedom. To control for the critical impact of head motion on functional connectivity analyses (Van Dijk et al., 2012), ICA-AROMA was applied to remove motion-related artifacts before filtering, subjects with head motion > 3 mm or high mean frame-wise displacement (mean FD, > 0.3 mm) were excluded, and for the group-level analysis (Power et al., 2012) mean FD was included as a covariate. Kruskal-Wallis one way-ANOVA indicated that there was no significant difference between the four treatment groups with respect to mean FD ( $FD_{ATD^+OXT}=0.1$ ,  $SD=0.05$ ,  $FD_{ATD^+PLC}=SD=0.03$ ,  $FD_{ATD^-OXT}=0.08$ ,  $SD=0.02$ ,  $FD_{ATD^-PLC}=0.07$ ,  $SD=0.03$ ,  $F_{(3,108)}=6.65$ ,  $p>0.05$ ).

## Functional connectivity analyses

In line with our research question, the main and interaction effects of treatments (ATD<sup>+</sup> and OXT vs the respective control treatment conditions) were examined on the amygdala intrinsic networks by means of a seed-to-whole brain resting state connectivity analysis. Anatomical masks of the left amygdala and right amygdala from the Automated Anatomic Labeling (AAL) served as a priori defined seed regions. Individual functional connectivity (FC) maps were initially created for each participant using DPASFA 4.4 (advanced edition of DPABI, <http://rfmri.org/dpabi>) and each seed region by calculating Pearson correlations between the mean time-course extracted from the amygdala masks and all other voxels in the brain and subsequently transformed to z-maps using Fisher r-to-z transformation.

Effects of treatment were examined separately for the left and right amygdala intrinsic connectivity networks by means of a  $2 \times 2$  ANCOVA in SPM12 (Friston et al., 1994) with amino acid mixture (ATD<sup>+</sup>/ATD<sup>-</sup>) and intranasal spray (OXT/PLC) as between-subjects factor and mean FD and age as covariates and the grey matter mask template from DPABI as explicit mask. Our main hypothesis in terms of interactive effects between the OXT and 5-HT system was evaluated by means of applying a whole brain analysis with a stringent initial cluster-forming threshold which combine voxel wise  $p < 0.001$  with cluster wise  $p < 0.05$  family-wise error (FWE) corrected (Woo et al., 2014; Eklund et al., 2016; Daniel Kessler, 2017). The probabilistic maps from the Anatomy toolbox (version 2.2) (Eickhoff et al., 2005) were used to pinpoint regions exhibiting significant interaction effects. Post-hoc group comparisons were conducted to further disentangle significant interaction effects. To this end, parameter estimates of atlas-based independent masks were extracted and subjected to post-hoc comparisons with FDR-correction in R-Studio (Benjamini and Hochberg, 1995). To further examine associations with current stress levels Spearman's rank correlation were applied in SPSS to explore associations between extracted parameter estimates in significant cluster and PSS scores. The Z-values were calculated to additionally assess difference in the correlation coefficients between the treatment groups.

In addition, treatment main effects were explored using separate *t*-contrast analyses (ATD<sup>-</sup>-OXT vs. ATD<sup>-</sup>-PLC; ATD<sup>+</sup>-PLC vs. ATD<sup>-</sup>-PLC) given that the examination of the corresponding treatment main effects in the ANCOVA model would also capture the interactive effects of treatment. These exploratory analyses were conducted on the whole-brain level with a slightly less stringent cluster-extent threshold combine voxel-wise  $p < 0.005$  with cluster wise  $p < 0.05$  FWE corrected (Feng et al., 2015; Woo et al., 2014).

## Results

### Mood state

Effects of treatment on mood were assessed using a mixed-design ANOVA model including mixture (ATD<sup>+</sup> vs. ATD<sup>-</sup>) and intranasal spray (OXT vs. PLC) as between-subject factors, and timepoint (T1-T4; pre-oral administration, pre-intranasal administration, pre-fMRI, post-fMRI) as within-subject factor. In line with our previous study (Liu et al., 2021a), we observed significant main effects of timepoint on positive ( $F_{(3,327)} = 16.68, p < 0.001, \eta^2_p = 0.13$ ) and negative ( $F_{(3,327)} = 14.10, p < 0.001, \eta^2_p = 0.12$ ) affect, suggesting a general decline of positive and negative mood during the experiment (details see **Table S2**). We also observed a trend for an interaction effect between of ATD<sup>+</sup> and OXT on negative affect ( $F_{(1,108)} = 3.891, p = 0.051, \eta^2_p = 0.035$ ). Post-hoc comparisons revealed that participants who received ATD<sup>+</sup>-OXT treatment reported a higher negative affect than who received ATD<sup>+</sup>-PLC treatment ( $p = 0.043$ ) or received ATD<sup>-</sup>-OXT treatment ( $p = 0.057$ , trend), while there was no significant difference between participants who received ATD<sup>-</sup>-PLC treatment and those received the ATD<sup>+</sup>-PLC condition ( $p = 0.40$ ) or the ATD<sup>-</sup>-OXT condition ( $p = 0.45$ ), suggesting that the combination ATD<sup>+</sup> and OXT treatment produced stronger increases on negative mood, while neither ATD<sup>+</sup> nor OXT treatment did affect mood changes over the experiment in healthy individuals. No significant main effect of mixture or intranasal spray on both two types of mood was observed.

### Interaction between reduced serotonergic signaling and OXT on amygdala networks

In the whole-brain analysis, a significant interaction effect between treatments were observed with respect to left amygdala intrinsic coupling with a cluster located in the left hippocampus extending

into the adjacent midbrain (MNI,  $xyz = [-20 -28 -10]$ ,  $t_{106} = 4.69$ ,  $p_{\text{FWE-cluster}} = 0.046$ ,  $k = 118$  voxels, see **Figure 2A**). Probabilistic mapping by means of the Anatomy (version 2.2b) toolbox indicated that the interaction effect primarily encompassed the subiculum subregion of the left hippocampus. To disentangle the significant interaction effect, parameter estimates were extracted from the left subiculum using independently defined anatomical mask (Anatomy toolbox) for post-hoc comparisons which revealed that OXT (ATD<sup>-</sup>-OXT) significantly increased the connectivity relative to the PLC-reference (ATD<sup>-</sup>-PLC) group ( $p_{\text{FDR}} = 0.048$ , *Cohen's d* = 0.63), whereas pre-treatment with ATD<sup>+</sup> (ATD<sup>+</sup>-OXT) significantly attenuated the OXT-induced (ATD<sup>-</sup>-OXT) increase ( $p_{\text{FDR}} = 0.048$ , *Cohen's d* = 0.68) (see **Figure 2B**). Neither ATD<sup>+</sup> (ATD<sup>+</sup>-PLC) alone ( $p_{\text{FDR}} = 0.62$ , *Cohen's d* = 0.19) nor the combined application (ATD<sup>+</sup>-OXT,  $p_{\text{FDR}} = 0.84$ , *Cohen's d* = 0.05) significantly increased amygdala connectivity in comparison to the PLC-treated reference (ATD<sup>-</sup>-PLC) group. No significant interaction effects were observed for the right amygdala.

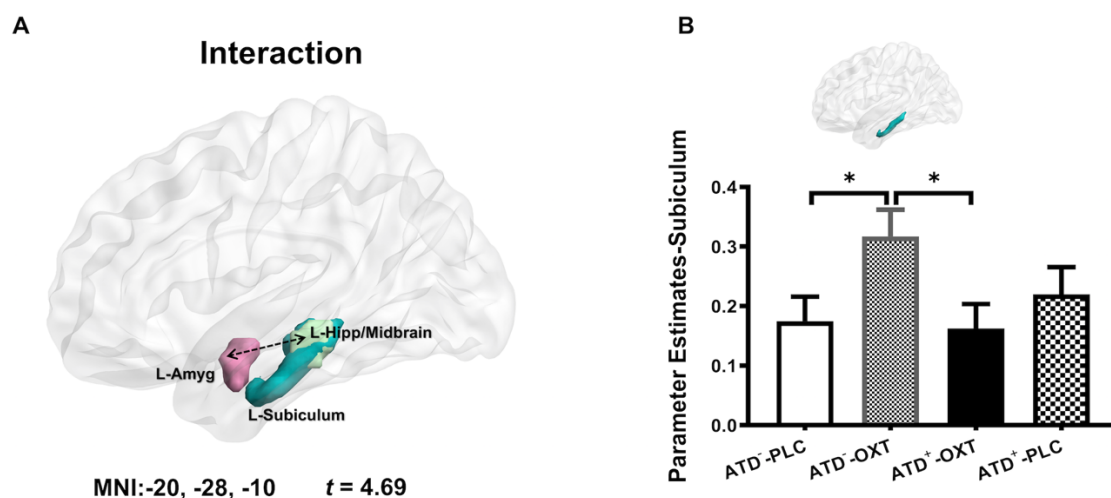

**Figure 2. Interaction effects between oxytocin and serotonin on the intrinsic connectivity of the left amygdala** (A) The whole brain voxel-wise analysis revealed a significant negative interaction effect of treatments on the functional connectivity between the left amygdala and a left hippocampus/midbrain cluster (in light green, whole brain corrected at  $p_{\text{FWE-cluster}} < 0.05$ ). The mask in light blue represents the left subiculum from the SPM Anatomy toolbox. (B) Post hoc comparisons between the treatment groups using extracted parameter estimates from the left subiculum anatomical mask. Group difference between ATD<sup>-</sup>-PLC and ATD<sup>-</sup>-OXT indicates that OXT significantly increased connectivity in this pathway in relative to the PLC-reference group, whereas the group difference between ATD<sup>-</sup>-OXT and ATD<sup>+</sup>-OXT indicates that pre-treatment with

acute tryptophan depletion significantly attenuated the OXT-induced increase. Bars indicate  $M \pm SEM$ , \*  $p_{FDR} < 0.05$ . Abbreviations: L, left; Amyg, amygdala; Hipp, hippocampus; OXT, Oxytocin; PLC, Placebo; ATD<sup>+</sup>, Acute Tryptophan Depletion; ATD<sup>-</sup>, Tryptophan Balanced Mixture. Note: \*  $p < 0.05$ , # means  $p$ -value marginal significant, two-tailed.

### Associations with current stress

Associations between current stress and neural indices were examined by means of examining correlations between PSS scores and neural indices of significant clusters. Examining current stress in the separate treatment groups revealed that in the group without OXT or 5-HT modulation (ATD<sup>-</sup>-PLC) there was a marginally significant negative correlation between PSS scores and the left amygdala-left hippocampus/midbrain connectivity ( $r_{S(26)} = -0.34$ ,  $p = 0.08$ ). Following OXT administration (ATD<sup>-</sup>-OXT) the association was positive even though it did not reach significance ( $r_{S(24)} = 0.25$ ,  $p = 0.22$ ), and the association was significantly different from the correlation observed under PLC (ATD<sup>-</sup>-PLC) treatment ( $z = 2.1$ ,  $p = 0.035$ , see **Figure 3**). In contrast, transient 5-HT downregulation alone (ATD<sup>+</sup>-PLC,  $r_{S(27)} = -0.07$ ,  $p = 0.72$ ) or combining with OXT (ATD<sup>+</sup>-OXT,  $r_{S(27)} = 0.10$ ,  $p = 0.62$ ) did not produce such significant difference compared with PLC group (ATD<sup>-</sup>-PLC vs. ATD<sup>+</sup>-PLC,  $z = 1.01$ ,  $p = 0.32$ ; ATD<sup>-</sup>-PLC vs. ATD<sup>+</sup>-OXT,  $z = 1.62$ ,  $p = 0.11$ ). Together this might reflect that the effects of OXT on the association between current stress and left amygdala-left hippocampus/brainstem connectivity were blocked by pre-treatment ATD<sup>+</sup> administration, whereas ATD<sup>+</sup> alone did not change the association.

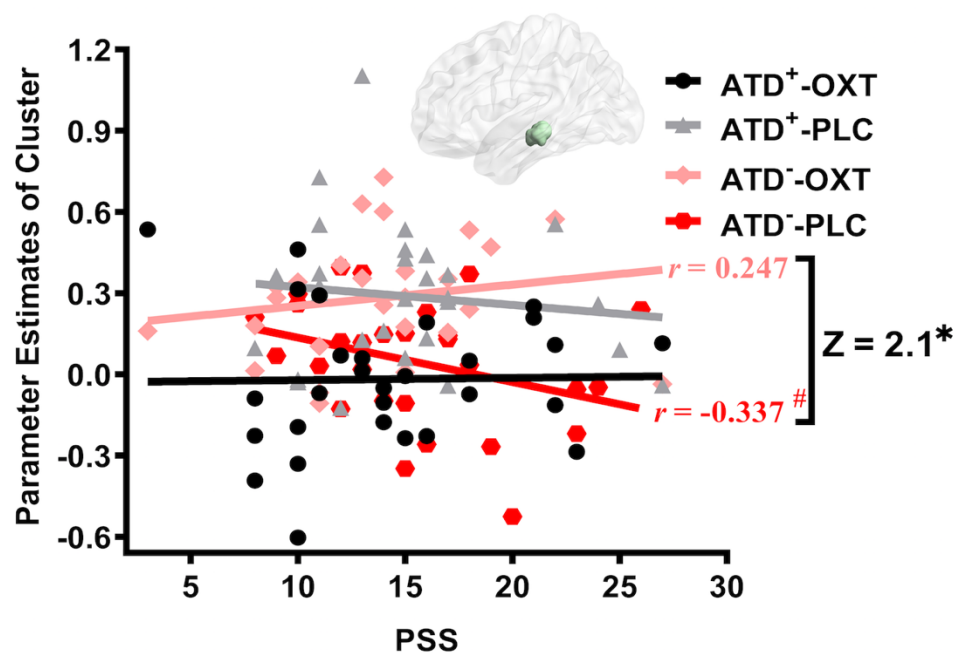

**Figure 3. Associations of with currently experienced stress.** Associations between PSS (Perceived Stress Scale) scores and parameter estimates extracted from the amygdala-hippocampal pathway displaying treatment interaction effects. Dots represent individual data. Abbreviations: OXT, Oxytocin; PLC, Placebo; ATD<sup>+</sup>, Acute Tryptophan Depletion; ATD<sup>-</sup>, Tryptophan Balanced Mixture. Note: \*  $p < 0.05$ , # means  $p$ -value marginal significant, two-tailed.

### Further analysis of general treatment effects

Exploratory analyses of treatment effects on amygdala intrinsic connectivity revealed that OXT increased the coupling of the left amygdala with left cerebellum (MNI,  $xyz = [-18 -66 -38]$ ,  $t_{106} = 4.69$ ,  $p_{\text{FWE-cluster}} = 0.042$ , 275 voxels, see **Figure S2**) and decreased the coupling of the left amygdala with the right medial prefrontal cortex (MNI,  $xyz = [32 56 26]$ ,  $t_{106} = -3.97$ ,  $p_{\text{FWE-cluster}} = 0.003$ , 446 voxels, see **Figure S2**). No significant treatment effects were observed for ATD<sup>+</sup> or the right amygdala.

### Discussion

The present study aimed at determining interactive effects of the OXT and 5-HT system on intrinsic organization of the amygdala-centered networks. To this end, we employed a pharmaco-rsfMRI design that combined the administration of intranasal OXT with a transient decrease in central 5-HT signaling via acute tryptophan depletion or the respective control conditions and resting state fMRI. Examining treatments effects on the intrinsic amygdala networks revealed an interactive effect of

OXT and 5-HT on the coupling of the left amygdala and a cluster encompassing the left subiculum of the hippocampus and the adjacent midbrain. Post-hoc analyses convergently demonstrated that OXT increased intrinsic coupling in this pathway while this effect of OXT was significantly attenuated during transiently decreased central serotonergic signaling induced via  $ATD^+$ . In the placebo ( $ATD^-$ -PLC) group lower connectivity in this pathway correlated with higher levels of experienced stress, suggesting a sensitivity of this pathway to current stress exposure. OXT induced a (non-significant) positive association and significantly altered the association as compared to the group without OXT and 5-HT modulation, while pre-treatment with  $ATD^+$  abolished the difference. Together the present findings indicate that the effects of OXT on stress-associated amygdala intrinsic pathways with the hippocampus are critically mediated by 5-HT.

Previous pharmaco-rsfMRI studies have demonstrated that intranasal OXT modulates the connectivity of the amygdala with prefrontal regions (Dodhia et al., 2014; Koch et al., 2016; Eckstein et al., 2017; Jiang et al., 2021) and the hippocampus (Fan et al., 2015; Kirkby et al., 2018; Alaerts et al., 2019), while animal models and an initial human study suggest that some effects of OXT in the domains of anxiety and amygdala threat-reactivity are critically mediated by the 5-HT system (Yoshida et al., 2009; Mottoliese et al., 2014). Within this context the present findings further extend previous findings that specifically the oxytocinergic modulation of the intrinsic coupling between the amygdala and the hippocampus/midbrain is critically mediated by interactive effects with the 5-HT system.

Across species, the amygdala-hippocampus-midbrain circuitry plays a role in the reactivity to potential threatening stimuli and stress reactivity (Belujon and Grace, 2011). In humans, intrinsic coupling in the amygdala-hippocampus pathway has been associated with acute and prolonged effects of stress exposure (Sripada et al., 2012; Vaisvaser et al., 2013; Fan et al., 2015; Zhang et al., 2016) and a recent intracranial electroencephalography study suggests that this pathway accurately tracks mood variations in humans (Kirkby et al., 2018). Whereas the functional role of the amygdala-midbrain pathways has not been extensively examined by means of rsfMRI in humans, animal models have documented its critical role in the selection of threat-induced behavioral responses and associated aversive learning processes (Steinberg et al., 2020). Previous intranasal OXT studies in

humans reported an oxytocinergic modulation of amygdala-midbrain coupling during exposure to threatening social stimuli (Kirsch, 2005) as well as on oxytocinergic regulation of stress-induced changes in intrinsic amygdala-hippocampal coupling (Fan et al., 2015). These findings are in line with overarching theories on the regulatory role of OXT on stress- and anxiety-related processes (e.g. Neumann and Slattery, 2016; Kendrick et al., 2018; Matsushita et al., 2019) and the present findings suggest that this role of OXT is partly mediated by the 5-HT system.

We additionally observed a modulatory effect of OXT on amygdala-mPFC connectivity by comparing ATD-OXT treated participants with ATD-PLC. Modulation of the amygdala-prefrontal pathways has been repeatedly reported following OXT and while several studies reported increased connectivity (Dodhia et al., 2014; Koch et al., 2016; Eckstein et al., 2017; Jiang et al., 2021) some studies reported decreased amygdala-mPFC connectivity in healthy adult males (Dodhia et al., 2014; Koch et al., 2016). Previous studies moreover reported that OXT modulation on this pathway varies by age and sex, for example, OXT increased amygdala-mPFC connectivity of young women, but not men or older women (Ebner et al., 2016). In contrast to the amygdala-hippocampal pathways, the amygdala-prefrontal pathways did not show interactive effects of 5-HT and OXT partly resembling findings from initial human and non-human primate studies that did not observe interactive effects on these pathways (Lefevre et al., 2017; Mottolese et al., 2014). Finally, we observed an OXT-induced effect on the coupling of the amygdala with cerebellar regions, which partly replicates previous studies (Stoodley and Schmahmann, 2010; Eckstein et al., 2017). Together, the present findings suggest that effects of OXT on the amygdala-hippocampus pathway may be specifically mediated by the 5-HT system.

Findings of the present study need to be considered in the context of the following limitations. First, only male subjects were enrolled due to previous studies showing marked sex-differences in the 5-HT synthesis (Nishizawa et al., 1997) and sex-differences in the effects of OXT in rodents and humans (Dumais and Veenema, 2016; Dumais et al., 2017; Ma et al., 2018; Xu et al., 2020; Lieberz et al., 2020). Future studies need to determine whether the observed effects generalize to women. Second, tryptophan blood and OXT blood levels were not assessed. Although previous studies reported robust and selective decreases in 5-HT signaling (Crockett et al., 2008; Passamonti et al.,



2012) and increases in (peripheral) OXT levels (Burri et al., 2008; Gossen et al., 2012) following similar the ATD<sup>+</sup> or OXT treatment protocols as used in the present study, the additional examination of blood-level measures particularly in the combined treatment group may reveal important additional information on the interaction of the two systems and should be included in future studies.

## **Conclusion**

The present study explored the interactive effects of the OXT and 5-HT system on intrinsic amygdala networks. Our results suggested that OXT enhanced the coupling of the left amygdala with the left hippocampus and the adjacent midbrain and that this effect of OXT was abolished by a transient decrease in central 5-HT signaling. Connectivity in this pathway was associated with levels of current stress under placebo yet this association was switched following OXT administration. Together the present findings indicate that the effects of OXT on stress-associated amygdala pathways, in particular amygdala-hippocampus communication, are critically mediated by 5-HT.

## **Funding**

This work was supported by the National Key Research and Development Program of China (Grant No. 2018YFA0701400). None of the authors reports a conflict of interest.

## Reference

- Admon, R., Lubin, G., Stern, O., Rosenberg, K., Sela, L., Ben-Ami, H., Hendler, T., 2009. Human vulnerability to stress depends on amygdala's predisposition and hippocampal plasticity. *Proc. Natl. Acad. Sci.* 106, 14120–14125. <https://doi.org/10.1073/pnas.0903183106>
- Alaerts, K., Bernaerts, S., Vanaudenaerde, B., Daniels, N., Wenderoth, N., 2019. Amygdala-Hippocampal Connectivity Is Associated with Endogenous Levels of Oxytocin and Can Be Altered by Exogenously Administered Oxytocin in Adults With Autism. *Biol. Psychiatry Cogn. Neurosci. Neuroimaging* 4, 655–663. <https://doi.org/10.1016/j.bpsc.2019.01.008>
- Beck, A.T., Steer, R.A., Ball, R., Ranieri, W.F., 1996. Comparison of Beck Depression Inventories-IA and-II in Psychiatric Outpatients. *J. Pers. Assess.* 67, 588–597. [https://doi.org/10.1207/s15327752jpa6703\\_13](https://doi.org/10.1207/s15327752jpa6703_13)
- Belujon, P., Grace, A.A., 2011. Hippocampus, amygdala, and stress: interacting systems that affect susceptibility to addiction. *Ann. N. Y. Acad. Sci.* 1216, 114–121. <https://doi.org/10.1111/j.1749-6632.2010.05896.x>
- Benjamini, Y., Hochberg, Y., 1995. Controlling the False Discovery Rate: A Practical and Powerful Approach to Multiple Testing. *J. R. Stat. Soc. Ser. B Methodol.* 57, 289–300. <https://doi.org/10.1111/j.2517-6161.1995.tb02031.x>
- Bethlehem, R.A.I., van Honk, J., Auyeung, B., Baron-Cohen, S., 2013. Oxytocin, brain physiology, and functional connectivity: A review of intranasal oxytocin fMRI studies. *Psychoneuroendocrinology* 38, 962–974. <https://doi.org/10.1016/j.psyneuen.2012.10.011>
- Brodmann, K., Gruber, O., Goya-Maldonado, R., 2017. Intranasal Oxytocin Selectively Modulates Large-Scale Brain Networks in Humans. *Brain Connect.* brain.2017.0528. <https://doi.org/10.1089/brain.2017.0528>
- Burri, A., Heinrichs, M., Schedlowski, M., Kruger, T.H.C., 2008. The acute effects of intranasal oxytocin administration on endocrine and sexual function in males. *Psychoneuroendocrinology* 33, 591–600. <https://doi.org/10.1016/j.psyneuen.2008.01.014>
- Carhart-Harris, R.L., Murphy, K., Leech, R., Erritzoe, D., Wall, M.B., Ferguson, B., Williams, L.T.J., Roseman, L., Brugger, S., De Meer, I., Tanner, M., Tyacke, R., Wolff, K., Sethi, A., Bloomfield, M.A.P., Williams, T.M., Bolstridge, M., Stewart, L., Morgan, C., Newbould, R.D., Feilding, A., Curran, H.V., Nutt, D.J., 2015. The Effects of Acutely Administered 3,4-Methylenedioxymethamphetamine on Spontaneous Brain Function in Healthy Volunteers Measured with Arterial Spin Labeling and Blood Oxygen Level-Dependent Resting State Functional Connectivity. *Biol. Psychiatry* 78, 554–562. <https://doi.org/10.1016/j.biopsych.2013.12.015>
- Chen, Y., Becker, B., Zhang, Y., Cui, H., Du, J., Wernicke, J., Montag, C., Kendrick, K.M., Yao, S., 2020. Oxytocin increases the pleasantness of affective touch and orbitofrontal cortex activity independent of valence. *Eur. Neuropsychopharmacol. J. Eur. Coll. Neuropsychopharmacol.* 39, 99–110. <https://doi.org/10.1016/j.euroneuro.2020.08.003>
- Cheng, W., Rolls, E.T., Qiu, J., Xie, X., Lyu, W., Li, Y., Huang, C.-C., Yang, A.C., Tsai, S.-J., Lyu, F., Zhuang, K., Lin, C.-P., Xie, P., Feng, J., 2018. Functional connectivity of the human amygdala in health and in depression. *Soc. Cogn. Affect. Neurosci.* 13, 557–568. <https://doi.org/10.1093/scan/nsy032>

- Cohen, S., Kamarck, T., Mermelstein, R., 1983. A global measure of perceived stress. *J. Health Soc. Behav.* 24, 385–396.
- Cools, R., Calder, A.J., Lawrence, A.D., Clark, L., Bullmore, E., Robbins, T.W., 2005. Individual differences in threat sensitivity predict serotonergic modulation of amygdala response to fearful faces. *Psychopharmacology (Berl.)* 180, 670–679. <https://doi.org/10.1007/s00213-005-2215-5>
- Crockett, M.J., Clark, L., Tabibnia, G., Lieberman, M.D., Robbins, T.W., 2008. Serotonin Modulates Behavioral Reactions to Unfairness. *Science* 320, 1739–1739. <https://doi.org/10.1126/science.1155577>
- Daniel Kessler, M.A., 2017. Reevaluating “cluster failure” in fMRI using nonparametric control of the false discovery rate. *Proc. Natl. Acad. Sci. U. S. A.* 114, E3372. <https://doi.org/10.1073/pnas.1614502114>
- Dodhia, S., Hosanagar, A., Fitzgerald, D.A., Labuschagne, I., Wood, A.G., Nathan, P.J., Phan, K.L., 2014. Modulation of Resting-State Amygdala-Frontal Functional Connectivity by Oxytocin in Generalized Social Anxiety Disorder. *Neuropsychopharmacology* 39, 2061–2069. <https://doi.org/10.1038/npp.2014.53>
- Dölen, G., Darvishzadeh, A., Huang, K.W., Malenka, R.C., 2013. Social reward requires coordinated activity of nucleus accumbens oxytocin and serotonin. *Nature* 501, 179–184. <https://doi.org/10.1038/nature12518>
- Domes, G., Lischke, A., Berger, C., Grossmann, A., Hauenstein, K., Heinrichs, M., Herpertz, S.C., 2010. Effects of intranasal oxytocin on emotional face processing in women. *Psychoneuroendocrinology, PSYCHONEUROENDOCRINE IMAGING* 35, 83–93. <https://doi.org/10.1016/j.psyneuen.2009.06.016>
- Dumais, K.M., Kulkarni, P.P., Ferris, C.F., Veenema, A.H., 2017. Sex differences in neural activation following different routes of oxytocin administration in awake adult rats. *Psychoneuroendocrinology* 81, 52–62. <https://doi.org/10.1016/j.psyneuen.2017.04.003>
- Dumais, K.M., Veenema, A.H., 2016. Vasopressin and oxytocin receptor systems in the brain: Sex differences and sex-specific regulation of social behavior. *Front. Neuroendocrinol.* 40, 1–23. <https://doi.org/10.1016/j.yfrne.2015.04.003>
- Dutta, A., McKie, S., Downey, D., Thomas, E., Juhasz, G., Arnone, D., Elliott, R., Williams, S., Deakin, J.F.W., Anderson, I.M., 2019. Regional default mode network connectivity in major depressive disorder: modulation by acute intravenous citalopram. *Transl. Psychiatry* 9, 116. <https://doi.org/10.1038/s41398-019-0447-0>
- Ebner, N.C., Chen, H., Porges, E., Lin, T., Fischer, H., Feifel, D., Cohen, R.A., 2016. Oxytocin’s effect on resting-state functional connectivity varies by age and sex. *Psychoneuroendocrinology* 69, 50–59. <https://doi.org/10.1016/j.psyneuen.2016.03.013>
- Eckstein, M., Markett, S., Kendrick, K.M., Ditzen, B., Liu, F., Hurlemann, R., Becker, B., 2017. Oxytocin differentially alters resting state functional connectivity between amygdala subregions and emotional control networks: Inverse correlation with depressive traits. *NeuroImage* 149, 458–467. <https://doi.org/10.1016/j.neuroimage.2017.01.078>
- Eickhoff, S., Stephan, K., Mohlberg, H., Grefkes, C., Fink, G., Amunts, K., Zilles, K., 2005. Eickhoff SB, Stephan KE, Mohlberg H, Grefkes C, Fink GR, Amunts K, Zilles KA new SPM toolbox

- for combining probabilistic cytoarchitectonic maps and functional imaging data. *Neuroimage* 25:1325-1335. *NeuroImage* 25, 1325–35. <https://doi.org/10.1016/j.neuroimage.2004.12.034>
- Eisner, P., Klasen, M., Wolf, D., Zerres, K., Eggermann, T., Eisert, A., Zvyagintsev, M., Sarkheil, P., Mathiak, K.A., Zepf, F., Mathiak, K., 2017. Cortico-limbic connectivity in MAOA-L carriers is vulnerable to acute tryptophan depletion. *Hum. Brain Mapp.* 38, 1622–1635. <https://doi.org/10.1002/hbm.23475>
- Eklund, A., Nichols, T.E., Knutsson, H., 2016. Cluster failure: Why fMRI inferences for spatial extent have inflated false-positive rates. *Proc. Natl. Acad. Sci.* 113, 7900–7905. <https://doi.org/10.1073/pnas.1602413113>
- Etkin, A., Büchel, C., Gross, J.J., 2015. The neural bases of emotion regulation. *Nat. Rev. Neurosci.* 16, 693–700. <https://doi.org/10.1038/nrn4044>
- Evers, E.A.T., Sambeth, A., Ramaekers, J.G., Riedel, W.J., van der Veen, F.M., 2010. The Effects of Acute Tryptophan Depletion on Brain Activation During Cognition and Emotional Processing in Healthy Volunteers. *Curr. Pharm. Des.* 16, 1998–2011. <https://doi.org/10.2174/138161210791293060>
- Fan, Y., Herrera-Melendez, A.L., Pestke, K., Feeser, M., Aust, S., Otte, C., Pruessner, J.C., Böker, H., Bajbouj, M., Grimm, S., 2014. Early life stress modulates amygdala-prefrontal functional connectivity: Implications for oxytocin effects. *Hum. Brain Mapp.* 35, 5328–5339. <https://doi.org/10.1002/hbm.22553>
- Fan, Y., Pestke, K., Feeser, M., Aust, S., Pruessner, J.C., Böker, H., Bajbouj, M., Grimm, S., 2015. Amygdala–Hippocampal Connectivity Changes During Acute Psychosocial Stress: Joint Effect of Early Life Stress and Oxytocin. *Neuropsychopharmacology* 40, 2736–2744. <https://doi.org/10.1038/npp.2015.123>
- Feng, C., Hackett, P.D., DeMarco, A.C., Chen, X., Stair, S., Haroon, E., Ditzen, B., Pagnoni, G., Rilling, J.K., 2015. Oxytocin and vasopressin effects on the neural response to social cooperation are modulated by sex in humans. *Brain Imaging Behav.* 9, 754–764. <https://doi.org/10.1007/s11682-014-9333-9>
- Feng, P., Becker, B., Zheng, Y., Feng, T., 2018. Sleep deprivation affects fear memory consolidation: bi-stable amygdala connectivity with insula and ventromedial prefrontal cortex. *Soc. Cogn. Affect. Neurosci.* 13, 145–155. <https://doi.org/10.1093/scan/nsx148>
- Fisher, P.M., Hariri, A.R., 2013. Identifying serotonergic mechanisms underlying the corticolimbic response to threat in humans. *Philos. Trans. R. Soc. Lond. B. Biol. Sci.* 368, 20120192. <https://doi.org/10.1098/rstb.2012.0192>
- Friston, K.J., Holmes, A.P., Worsley, K.J., Poline, J.-P., Frith, C.D., Frackowiak, R.S.J., 1994. Statistical parametric maps in functional imaging: A general linear approach. *Hum. Brain Mapp.* 2, 189–210. <https://doi.org/10.1002/hbm.460020402>
- Gimpl, G., Fahrenholz, F., 2001. The oxytocin receptor system: structure, function, and regulation. *Physiol. Rev.* 81, 629–683. <https://doi.org/10.1152/physrev.2001.81.2.629>
- Gossen, A., Hahn, A., Westphal, L., Prinz, S., Schultz, R.T., Gründer, G., Spreckelmeyer, K.N., 2012. Oxytocin plasma concentrations after single intranasal oxytocin administration – A study in healthy men. *Neuropeptides* 46, 211–215. <https://doi.org/10.1016/j.npep.2012.07.001>

- Gothard, K.M., 2020. Multidimensional processing in the amygdala. *Nat. Rev. Neurosci.* 21, 565–575. <https://doi.org/10.1038/s41583-020-0350-y>
- Greve, D.N., Fischl, B., 2009. Accurate and robust brain image alignment using boundary-based registration. *NeuroImage* 48, 63–72. <https://doi.org/10.1016/j.neuroimage.2009.06.060>
- Grinevich, V., Neumann, I.D., 2021. Brain oxytocin: how puzzle stones from animal studies translate into psychiatry. *Mol. Psychiatry* 26, 265–279. <https://doi.org/10.1038/s41380-020-0802-9>
- Heinrichs, M., von Dawans, B., Domes, G., 2009. Oxytocin, vasopressin, and human social behavior. *Front. Neuroendocrinol.* 30, 548–557. <https://doi.org/10.1016/j.yfrne.2009.05.005>
- Herrington, R., Birn, R., Ruttle, P., Burghy, C., Stodola, D., Davidson, R., Essex, M., 2013. Childhood maltreatment is associated with altered fear circuitry and increased internalizing symptoms by late adolescence. *Proc. Natl. Acad. Sci. U. S. A.* 110. <https://doi.org/10.1073/pnas.1310766110>
- Holmes, A., 2008. Genetic variation in cortico-amygdala serotonin function and risk for stress-related disease. *Neurosci. Biobehav. Rev., Predator Odors, 5HT and Emotion* 32, 1293–1314. <https://doi.org/10.1016/j.neubiorev.2008.03.006>
- Jenkinson, M., Bannister, P., Brady, M., Smith, S., 2002. Improved optimization for the robust and accurate linear registration and motion correction of brain images. *NeuroImage* 17, 825–841. [https://doi.org/10.1016/s1053-8119\(02\)91132-8](https://doi.org/10.1016/s1053-8119(02)91132-8)
- Jenkinson, M., Smith, S., 2001. A global optimisation method for robust affine registration of brain images. *Med. Image Anal.* 5, 143–156. [https://doi.org/10.1016/S1361-8415\(01\)00036-6](https://doi.org/10.1016/S1361-8415(01)00036-6)
- Jiang, X., Ma, X., Geng, Y., Zhao, Zhiying, Zhou, F., Zhao, W., Yao, S., Yang, S., Zhao, Zhongbo, Becker, B., Kendrick, K.M., 2021. Intrinsic, dynamic and effective connectivity among large-scale brain networks modulated by oxytocin. *NeuroImage* 227, 117668. <https://doi.org/10.1016/j.neuroimage.2020.117668>
- Kanat, M., Heinrichs, M., Mader, I., van Elst, L.T., Domes, G., 2015. Oxytocin Modulates Amygdala Reactivity to Masked Fearful Eyes. *Neuropsychopharmacol. Off. Publ. Am. Coll. Neuropsychopharmacol.* 40, 2632–2638. <https://doi.org/10.1038/npp.2015.111>
- Kendrick, K.M., Guastella, A.J., Becker, B., 2018. Overview of Human Oxytocin Research. *Curr. Top. Behav. Neurosci.* 35, 321–348. [https://doi.org/10.1007/7854\\_2017\\_19](https://doi.org/10.1007/7854_2017_19)
- Kirkby, L.A., Luongo, F.J., Lee, M.B., Nahum, M., Van Vleet, T.M., Rao, V.R., Dawes, H.E., Chang, E.F., Sohal, V.S., 2018. An Amygdala-Hippocampus Subnetwork that Encodes Variation in Human Mood. *Cell* 175, 1688-1700.e14. <https://doi.org/10.1016/j.cell.2018.10.005>
- Kirsch, P., 2005. Oxytocin Modulates Neural Circuitry for Social Cognition and Fear in Humans. *J. Neurosci.* 25, 11489–11493. <https://doi.org/10.1523/JNEUROSCI.3984-05.2005>
- Koch, S.B.J., van Zuiden, M., Nawijn, L., Frijling, J.L., Veltman, D.J., Olf, M., 2016. Intranasal Oxytocin Normalizes Amygdala Functional Connectivity in Posttraumatic Stress Disorder. *Neuropsychopharmacology* 41, 2041–2051. <https://doi.org/10.1038/npp.2016.1>
- Kreuder, A.-K., Scheele, D., Schultz, J., Hennig, J., Marsh, N., Dellert, T., Ettinger, U., Philipsen, A., Babasiz, M., Herscheid, A., Remmersmann, L., Stirnberg, R., Stöcker, T., Hurlmann, R., 2020. Common and dissociable effects of oxytocin and lorazepam on the neurocircuitry of fear. *Proc. Natl. Acad. Sci. U. S. A.* 117, 11781–11787. <https://doi.org/10.1073/pnas.1920147117>

- Kumar, J., Völm, B., Palaniyappan, L., 2014. Oxytocin affects the connectivity of the precuneus and the amygdala: a randomized, double-blinded, placebo-controlled neuroimaging trial. *Int. J. Neuropsychopharmacol.* 18, pyu051. <https://doi.org/10.1093/ijnp/pyu051>
- LeDoux, J.E., Pine, D.S., 2016. Using Neuroscience to Help Understand Fear and Anxiety: A Two-System Framework. *Am. J. Psychiatry* 173, 1083–1093. <https://doi.org/10.1176/appi.ajp.2016.16030353>
- Lefevre, A., Mottolise, R., Redouté, J., Costes, N., Le Bars, D., Geoffray, M.-M., Leboyer, M., Sirigu, A., 2018. Oxytocin Fails to Recruit Serotonergic Neurotransmission in the Autistic Brain. *Cereb. Cortex* 28, 4169–4178. <https://doi.org/10.1093/cercor/bhx272>
- Lefevre, A., Richard, N., Jazayeri, M., Beuriat, P.-A., Fieux, S., Zimmer, L., Duhamel, J.-R., Sirigu, A., 2017. Oxytocin and Serotonin Brain Mechanisms in the Nonhuman Primate. *J. Neurosci.* 37, 6741–6750. <https://doi.org/10.1523/JNEUROSCI.0659-17.2017>
- Lieberz, J., Scheele, D., Spengler, F.B., Matheisen, T., Schneider, L., Stoffel-Wagner, B., Kinfe, T.M., Hurlmann, R., 2020. Kinetics of oxytocin effects on amygdala and striatal reactivity vary between women and men. *Neuropsychopharmacol. Off. Publ. Am. Coll. Neuropsychopharmacol.* 45, 1134–1140. <https://doi.org/10.1038/s41386-019-0582-6>
- Liu, C., Lan, C., Li, K., Zhou, F., Yao, S., Xu, L., Yang, N., Zhou, X., Yang, J., Yong, X., Ma, Y., Scheele, D., Kendrick, K.M., Becker, B., 2021a. Oxytocinergic modulation of threat-specific amygdala sensitization in humans is critically mediated by serotonergic mechanisms. *Biol. Psychiatry Cogn. Neurosci. Neuroimaging.* <https://doi.org/10.1016/j.bpsc.2021.04.009>
- Liu, C., Xu, L., Li, J., Zhou, F., Yang, X., Zheng, X., Fu, M., Li, K., Sindermann, C., Montag, C., Ma, Y., Scheele, D., Ebstein, R.P., Yao, S., Kendrick, K.M., Becker, B., 2021b. Serotonin and early life stress interact to shape brain architecture and anxious avoidant behavior - a TPH2 imaging genetics approach. *Psychol. Med.* 51, 2476–2484. <https://doi.org/10.1017/S0033291720002809>
- Ma, X., Zhao, W., Luo, R., Zhou, F., Geng, Y., Xu, L., Gao, Z., Zheng, X., Becker, B., Kendrick, K.M., 2018. Sex- and Context-dependent Effects of Oxytocin on Social Reward Processing (preprint). *Neuroscience.* <https://doi.org/10.1101/274027>
- Mahar, I., Bambico, F.R., Mechawar, N., Nobrega, J.N., 2014. Stress, serotonin, and hippocampal neurogenesis in relation to depression and antidepressant effects. *Neurosci. Biobehav. Rev.* 38, 173–192. <https://doi.org/10.1016/j.neubiorev.2013.11.009>
- Matsushita, H., Latt, H.M., Koga, Y., Nishiki, T., Matsui, H., 2019. Oxytocin and Stress: Neural Mechanisms, Stress-Related Disorders, and Therapeutic Approaches. *Neuroscience* 417, 1–10. <https://doi.org/10.1016/j.neuroscience.2019.07.046>
- Meyer-Lindenberg, A., Domes, G., Kirsch, P., Heinrichs, M., 2011. Oxytocin and vasopressin in the human brain: social neuropeptides for translational medicine. *Nat. Rev. Neurosci.* 12, 524–538. <https://doi.org/10.1038/nrn3044>
- Mihov, Y., Kendrick, K.M., Becker, B., Zschernack, J., Reich, H., Maier, W., Keysers, C., Hurlmann, R., 2013. Mirroring fear in the absence of a functional amygdala. *Biol. Psychiatry* 73, e9-11. <https://doi.org/10.1016/j.biopsych.2012.10.029>



- Mottolese, R., Redoute, J., Costes, N., Le Bars, D., Sirigu, A., 2014. Switching brain serotonin with oxytocin. *Proc. Natl. Acad. Sci. U. S. A.* 111, 8637–8642.  
<https://doi.org/10.1073/pnas.1319810111>
- Neumann, I.D., Landgraf, R., 2012. Balance of brain oxytocin and vasopressin: implications for anxiety, depression, and social behaviors. *Trends Neurosci.* 35, 649–659.  
<https://doi.org/10.1016/j.tins.2012.08.004>
- Neumann, I.D., Slattery, D.A., 2016. Oxytocin in General Anxiety and Social Fear: A Translational Approach. *Biol. Psychiatry* 79, 213–221. <https://doi.org/10.1016/j.biopsych.2015.06.004>
- Nishizawa, S., Benkelfat, C., Young, S.N., Leyton, M., Mzengeza, S., de Montigny, C., Blier, P., Diksic, M., 1997. Differences between males and females in rates of serotonin synthesis in human brain. *Proc. Natl. Acad. Sci. U. S. A.* 94, 5308–5313.  
<https://doi.org/10.1073/pnas.94.10.5308>
- Olf, M., Frijling, J.L., Kubzansky, L.D., Bradley, B., Ellenbogen, M.A., Cardoso, C., Bartz, J.A., Yee, J.R., van Zuiden, M., 2013. The role of oxytocin in social bonding, stress regulation and mental health: An update on the moderating effects of context and interindividual differences. *Psychoneuroendocrinology* 38, 1883–1894. <https://doi.org/10.1016/j.psyneuen.2013.06.019>
- Park, A.T., Leonard, J.A., Saxler, P.K., Cyr, A.B., Gabrieli, J.D.E., Mackey, A.P., 2018. Amygdala–medial prefrontal cortex connectivity relates to stress and mental health in early childhood. *Soc. Cogn. Affect. Neurosci.* 13, 430–439. <https://doi.org/10.1093/scan/nsy017>
- Pasqualetti, M., Ori, M., Nardi, I., Castagna, M., Cassano, G.B., Marazziti, D., 1998. Distribution of the 5-HT<sub>5A</sub> serotonin receptor mRNA in the human brain. *Brain Res. Mol. Brain Res.* 56, 1–8. [https://doi.org/10.1016/s0169-328x\(98\)00003-5](https://doi.org/10.1016/s0169-328x(98)00003-5)
- Passamonti, L., Crockett, M.J., Apergis-Schoute, A.M., Clark, L., Rowe, J.B., Calder, A.J., Robbins, T.W., 2012. Effects of Acute Tryptophan Depletion on Prefrontal-Amygdala Connectivity While Viewing Facial Signals of Aggression. *Biol. Psychiatry* 71, 36–43.  
<https://doi.org/10.1016/j.biopsych.2011.07.033>
- Phelps, E.A., LeDoux, J.E., 2005. Contributions of the amygdala to emotion processing: from animal models to human behavior. *Neuron* 48, 175–187.  
<https://doi.org/10.1016/j.neuron.2005.09.025>
- Power, J.D., Barnes, K.A., Snyder, A.Z., Schlaggar, B.L., Petersen, S.E., 2012. Spurious but systematic correlations in functional connectivity MRI networks arise from subject motion. *NeuroImage* 59, 2142–2154. <https://doi.org/10.1016/j.neuroimage.2011.10.018>
- Quintana, D.S., Lischke, A., Grace, S., Scheele, D., Ma, Y., Becker, B., 2021. Advances in the field of intranasal oxytocin research: lessons learned and future directions for clinical research. *Mol. Psychiatry* 26, 80–91. <https://doi.org/10.1038/s41380-020-00864-7>
- Quintana, D.S., Rokicki, J., van der Meer, D., Alnæs, D., Kaufmann, T., Córdova-Palomera, A., Dieset, I., Andreassen, O.A., Westlye, L.T., 2019. Oxytocin pathway gene networks in the human brain. *Nat. Commun.* 10, 668. <https://doi.org/10.1038/s41467-019-08503-8>
- Raab, K., Kirsch, P., Mier, D., 2016. Understanding the impact of 5-HTTLPR, antidepressants, and acute tryptophan depletion on brain activation during facial emotion processing: A review of the imaging literature. *Neurosci. Biobehav. Rev.* 71, 176–197.  
<https://doi.org/10.1016/j.neubiorev.2016.08.031>



- Shamay-Tsoory, S.G., Abu-Akel, A., 2016. The Social Salience Hypothesis of Oxytocin. *Biol. Psychiatry* 79, 194–202. <https://doi.org/10.1016/j.biopsych.2015.07.020>
- Spengler, F.B., Becker, B., Kendrick, K.M., Conrad, R., Hurlemann, R., Schade, G., 2017a. Emotional Dysregulation in Psychogenic Voice Loss. *Psychother. Psychosom.* 86, 121–123. <https://doi.org/10.1159/000452306>
- Spengler, F.B., Schultz, J., Scheele, D., Essel, M., Maier, W., Heinrichs, M., Hurlemann, R., 2017b. Kinetics and Dose Dependency of Intranasal Oxytocin Effects on Amygdala Reactivity. *Biol. Psychiatry* 82, 885–894. <https://doi.org/10.1016/j.biopsych.2017.04.015>
- Spielberger, C.D., Gorsuch, R.L., Lushene, R.E., 1970. Manual for the State-Trait Anxiety Inventory. Consulting Psychologists Press, Palo Alto, CA.
- Sripada, R.K., King, A.P., Garfinkel, S.N., Wang, X., Sripada, C.S., Welsh, R.C., Liberzon, I., 2012. Altered resting-state amygdala functional connectivity in men with posttraumatic stress disorder. *J. Psychiatry Neurosci.* JPN 37, 241–249. <https://doi.org/10.1503/jpn.110069>
- Steinberg, E.E., Gore, F., Heifets, B.D., Taylor, M.D., Norville, Z.C., Beier, K.T., Földy, C., Lerner, T.N., Luo, L., Deisseroth, K., Malenka, R.C., 2020. Amygdala-Midbrain Connections Modulate Appetitive and Aversive Learning. *Neuron* 106, 1026-1043.e9. <https://doi.org/10.1016/j.neuron.2020.03.016>
- Stoodley, C.J., Schmahmann, J.D., 2010. Evidence for topographic organization in the cerebellum of motor control versus cognitive and affective processing. *Cortex J. Devoted Study Nerv. Syst. Behav.* 46, 831–844. <https://doi.org/10.1016/j.cortex.2009.11.008>
- Vaisvaser, S., Lin, T., Admon, R., Podlipsky, I., Greenman, Y., Stern, N., Fruchter, E., Wald, I., Pine, D.S., Tarrasch, R., Bar-Haim, Y., Hendler, T., 2013. Neural traces of stress: cortisol related sustained enhancement of amygdala-hippocampal functional connectivity. *Front. Hum. Neurosci.* 7, 313. <https://doi.org/10.3389/fnhum.2013.00313>
- Van Dijk, K.R.A., Sabuncu, M.R., Buckner, R.L., 2012. The influence of head motion on intrinsic functional connectivity MRI. *NeuroImage, Neuroergonomics: The human brain in action and at work* 59, 431–438. <https://doi.org/10.1016/j.neuroimage.2011.07.044>
- Varnäs, K., Halldin, C., Hall, H., 2004. Autoradiographic distribution of serotonin transporters and receptor subtypes in human brain. *Hum. Brain Mapp.* 22, 246–260. <https://doi.org/10.1002/hbm.20035>
- Veen, F.M. van der, Evers, E.A.T., Deutz, N.E.P., Schmitt, J.A.J., 2007. Effects of Acute Tryptophan Depletion on Mood and Facial Emotion Perception Related Brain Activation and Performance in Healthy Women with and without a Family History of Depression. *Neuropsychopharmacology* 32, 216–224. <https://doi.org/10.1038/sj.npp.1301212>
- Watson, D., Clark, L.A., Tellegen, A., 1988. Development and validation of brief measures of positive and negative affect: The PANAS scales. *J. Pers. Soc. Psychol.* 54, 1063–1070. <https://doi.org/10.1037/0022-3514.54.6.1063>
- Woo, C.-W., Krishnan, A., Wager, T.D., 2014. Cluster-extent based thresholding in fMRI analyses: Pitfalls and recommendations. *NeuroImage* 91, 412–419. <https://doi.org/10.1016/j.neuroimage.2013.12.058>

- Wu, H., Feng, C., Lu, X., Liu, X., Liu, Q., 2020. Oxytocin effects on the resting-state mentalizing brain network. *Brain Imaging Behav.* 14, 2530–2541. <https://doi.org/10.1007/s11682-019-00205-5>
- Xin, F., Zhou, F., Zhou, X., Ma, X., Geng, Y., Zhao, W., Yao, S., Dong, D., Biswal, B.B., Kendrick, K.M., Becker, B., 2021. Oxytocin Modulates the Intrinsic Dynamics Between Attention-Related Large-Scale Networks. *Cereb. Cortex N. Y. N 1991* 31, 1848–1860. <https://doi.org/10.1093/cercor/bhy295>
- Xin, F., Zhou, X., Dong, D., Zhao, Z., Yang, X., Wang, Q., Gu, Y., Kendrick, K.M., Chen, A., Becker, B., 2020. Oxytocin Differentially Modulates Amygdala Responses during Top-Down and Bottom-Up Aversive Anticipation. *Adv. Sci. Weinh. Baden-Wurt. Ger.* 7, 2001077. <https://doi.org/10.1002/advs.202001077>
- Xu, L., Becker, B., Luo, R., Zheng, X., Zhao, W., Zhang, Q., Kendrick, K.M., 2020. Oxytocin amplifies sex differences in human mate choice. *Psychoneuroendocrinology* 112, 104483. <https://doi.org/10.1016/j.psyneuen.2019.104483>
- Xu, X., Dai, J., Chen, Y., Liu, C., Xin, F., Zhou, X., Zhou, F., Stamatakis, E.A., Yao, S., Luo, L., Huang, Y., Wang, J., Zou, Z., Vatansever, D., Kendrick, K.M., Zhou, B., Becker, B., 2021. Intrinsic connectivity of the prefrontal cortex and striato-limbic system respectively differentiate major depressive from generalized anxiety disorder. *Neuropsychopharmacology* 46, 791–798. <https://doi.org/10.1038/s41386-020-00868-5>
- Yao, S., Zhao, W., Geng, Y., Chen, Y., Zhao, Z., Ma, X., Xu, L., Becker, B., Kendrick, K.M., 2018. Oxytocin Facilitates Approach Behavior to Positive Social Stimuli via Decreasing Anterior Insula Activity. *Int. J. Neuropsychopharmacol.* 21, 918–925. <https://doi.org/10.1093/ijnp/pyy068>
- Yoshida, M., Takayanagi, Y., Inoue, K., Kimura, T., Young, L.J., Onaka, T., Nishimori, K., 2009. Evidence That Oxytocin Exerts Anxiolytic Effects via Oxytocin Receptor Expressed in Serotonergic Neurons in Mice. *J. Neurosci.* 29, 2259–2271. <https://doi.org/10.1523/JNEUROSCI.5593-08.2009>
- Young, L.J., Wang, Z., 2004. The neurobiology of pair bonding. *Nat. Neurosci.* 7, 1048–1054. <https://doi.org/10.1038/nn1327>
- Zhang, X., Huettel, S.A., Mullette-Gillman, O.A., Guo, H., Wang, L., 2019. Exploring common changes after acute mental stress and acute tryptophan depletion: Resting-state fMRI studies. *J. Psychiatr. Res.* 113, 172–180. <https://doi.org/10.1016/j.jpsychires.2019.03.025>
- Zhang, X., Zhang, J., Wang, L., Li, R., Zhang, W., 2016. Altered resting-state functional connectivity of the amygdala in Chinese earthquake survivors. *Prog. Neuropsychopharmacol. Biol. Psychiatry* 65, 208–214. <https://doi.org/10.1016/j.pnpbp.2015.10.003>
- Zhao, Z., Yao, S., Li, K., Sindermann, C., Zhou, F., Zhao, W., Li, J., Lühns, M., Goebel, R., Kendrick, K.M., Becker, B., 2019. Real-Time Functional Connectivity-Informed Neurofeedback of Amygdala-Frontal Pathways Reduces Anxiety. *Psychother. Psychosom.* 88, 5–15. <https://doi.org/10.1159/000496057>
- Zhou, F., Zhao, W., Qi, Z., Geng, Y., Yao, S., Kendrick, K.M., Wager, T.D., Becker, B., 2021. Beyond fear centers: a distributed fMRI-based neuromarker for the subjective experience of fear. <https://doi.org/10.1101/2020.11.23.394973>
